# Supplementary material for: A Reflective Spectroscopy and Mineralogical Investigation of Cosmetic Blush (Wet‘N’Wild) Potentially for Forensic Investigations Related to Interpersonal Violence—An Experimental Feasibility Study
Source: MDPI journal article supplement (doi:10.3390/forensicsci3040038), 2023-10-17
Supplement: s1 [file s1]

Archive with 1 entries (1 files):
- forensicsci-2486938-supplementary.pdf
